# Supplementary material for: Intercomparison of in situ NDIR and column FTIR measurements of CO 2 atJungfraujoch
Source: Copernicus journal article supplement (doi:10.5194/acp-16-9935-2016), 2016-08-08
Supplement: Supplementary file 1 [file acp-16-9935-2016-supplement.zip]

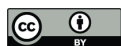

*Supplement of*

## **Intercomparison of in situ NDIR and column FTIR measurements of CO<sub>2</sub> at Jungfraujoch**

**Michael F. Schibig et al.**

*Correspondence to:* Markus C. Leuenberger (leuenberger@climate.unibe.ch)

- [acp-16-9935-2016-supplement-title-page.pdf](#)
- [FTIR\\_measurements.txt](#)

The copyright of individual parts of the supplement might differ from the CC-BY 3.0 licence.
